# Supplementary material
Source: PubMed Central journal article supplement (PMC3167507)
Supplement: 1105898108_pnas.1105898108_SI.pdf [file 1105898108_pnas.1105898108_SI.pdf]

# Supporting Information

Wilkinson-White et al. 10.1073/pnas.1105898108

## SI Methods.

**Protein Production and Purification.** GATA1<sub>NC</sub> (P17679, residues 200–318) and GATA1<sub>NF</sub> (P17679, residues 200–248) were expressed from pET-11A and pGEX-2T vectors, respectively, with induction by IPTG in *Escherichia coli* Rosetta 2 cells at 25 °C for 20 h.

Cells containing GATA1<sub>NC</sub> were lysed by sonication in 50 mM Tris, 100 mM NaCl, 40 μM ZnSO<sub>4</sub>, 0.5 mM PMSE, 0.1% (vol/vol) β-mercaptoethanol, pH 7.4, DNase (10 μg/mL), RNase (10 μg/mL) and MgCl<sub>2</sub> (10 mM) were added and the sample agitated on ice (30 min). The soluble fraction was applied to SP Sepharose Fast Flow (Sigma-Aldrich) resin and GATA1<sub>NC</sub> was eluted with a NaCl step gradient (0.2–1 M). The concentration of NaCl was adjusted to 0.2 M, and the protein was purified by cation exchange chromatography on a Uno S-1 column (BioRad) in 50 mM Tris, 40 μM Zn<sub>2</sub>SO<sub>4</sub>, 1 mM DTT pH 7.4 and eluted with 0.1–0.8 M NaCl. GATA1<sub>NC</sub> was further purified by size exclusion chromatography on a HiLoad 16/60 Superdex 75 column (GE Healthcare) in 50 mM Tris, 150 mM NaCl, 1 mM DTT pH 7.4.

GATA1<sub>NF</sub> was initially purified as previously described (1). Following this, the immobilized GST-fusion protein was eluted from glutathione (GSH) resin with 50 mM Tris, 150 mM NaCl, 10 mM CaCl<sub>2</sub>, 20 mM GSH pH 7.4, and the GST removed by treatment with thrombin (100 U) overnight at RT. GATA1<sub>NF</sub> was then purified using cation exchange chromatography on a

Uno S-1 column as for GATA1<sub>NC</sub>. Uniformly labeled <sup>15</sup>N or <sup>15</sup>N/<sup>13</sup>C LMO2<sub>LIM2</sub>-LDB1<sub>LID</sub>, LMO2<sub>LIM1+2</sub>-LDB1<sub>LID</sub>, dFOG<sub>F1</sub>, GATA1<sub>NC</sub>, and GATA1<sub>NF</sub> were prepared using the strategy developed by (2) and purified as described above.

**Interaction Assays.** <sup>35</sup>S-GATA1 constructs were produced using a Promega TnT (T7) Coupled Reticulocyte Lysate Transcription/Translation kit. Maltose binding protein (MBP)-GATA1 constructs were expressed in *E. coli* and partially purified by amylose affinity chromatography. Samples were incubated with GST-fusion proteins immobilized on GSH-sepharose beads in binding buffer (20 mM Tris, 250 mM NaCl, 0.5% (vol/vol) IGEPAL CA-630 (Sigma-Aldrich), 40 μM ZnSO<sub>4</sub>, 10% (vol/vol) glycerol, 1 mM DTT, 0.2 M PMSF pH 7.6) for 1.5 h at 4 °C. After extensive washing, bound proteins were analyzed by SDS-PAGE and visualized using a PhosphorImager (Molecular Dynamics), or Western blotting using an anti-MBP monoclonal antibody (Sigma-Aldrich). All GATA1<sub>NF</sub> mutants showing an interaction with LMO2<sub>LIM1+2</sub>-LDB1<sub>LID</sub> were purified without an affinity tag and folding was assessed by 1D <sup>1</sup>H NMR (Fig. S8B). Oligonucleotides were obtained from Sigma-Genosys, and EMSAs were carried out as described in ref. 3 except that samples were incubated without poly dIdC and separated on an 8% (wt/vol) nondenaturing polyacrylamide gel. Data were analyzed using a PhosphorImager (Molecular Dynamics).

1. Kowalski K, Czolij R, King GF, Crossley M, Mackay JP (1999) The solution structure of the N-terminal zinc finger of GATA-1 reveals a specific binding face for the transcriptional co-factor FOG. *J Biomol NMR* 13:249–262.

2. Marley J, Lu M, Brachen C (2001) A method for efficient isotopic labelling of recombinant proteins. *J Biomol NMR* 20:71–75.

3. Ryan DP, Duncan JL, Lee C, Kuchel PW, Matthews JM (2008) Assembly of the oncogenic DNA-binding complex LMO2-Ldb1-TAL1-E12. *Proteins* 70:1461–1474.
